# Supplementary material
Source: publisher site journal article supplement (https://www.dovepress.com/article/253234)
Supplement: Supplementary file 1 [file get_supplementary_file.php]

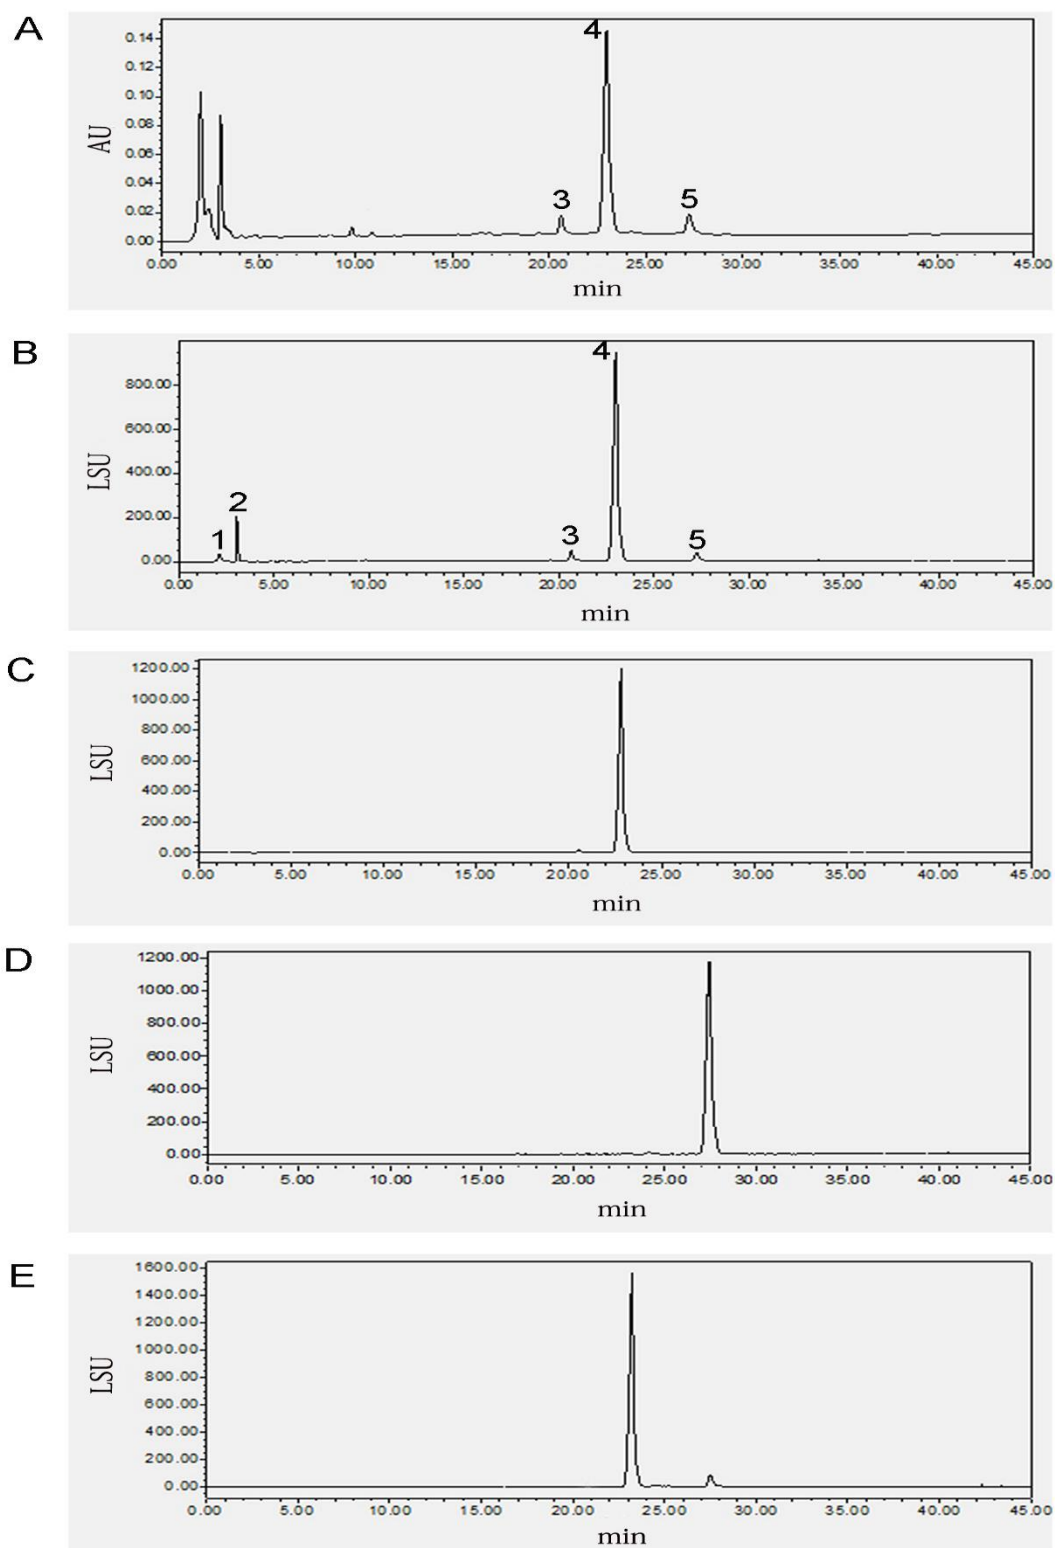

**Fig. S1** HPLC-UV of SSPH 60% and HPLC-ELSD of SSPH 60%, SSPH I, SSPH II and SSPH I plus SSPH II. HPLC-UV: High-performance liquid chromatography with ultraviolet detection; HPLC-ELSD: High performance liquid chromatography with an evaporative light scattering detection; SSPH 60%: The saponins were obtained from 60% ethanol by silica gel column and Sephadex lh-20 gel column. A: HPLC-UV of SSPH 60%; B: HPLC-ELSD of SSPH 60%; C: SSPH I; D: SSPH II; E: SSPH I plus SSPH II.

Under the experimental conditions, there are five obvious characteristic peaks in 0-30 min in the evaporative light-scattering detector chromatogram of SSPH 60%, which indicates that there are at least five kinds of compound in SSPH 60%. By contrast with monomer, we identified two characteristic peaks, respectively SSPH I and SSPH II, and their purity are both more than 95%. According to the area method, relative percentage of the SSPH I (compound 4) and SSPH II (compound 5) in SSPH 60% is 84.28% and 3.02%, compound 1 was 2.21%, compound 2 is 6.31%, compound 3 was 2.73%.
